# Supplementary material for: Maltodextrin modified liposomes for drug delivery through the blood–brain barrier
Source: Royal Society of Chemistry journal article supplement (doi:10.1039/c7md00045f), 2017-01-01
Supplement: c7md00045f1.pdf [file c7md00045f1.pdf]

Electronic supplementary information (ESI)

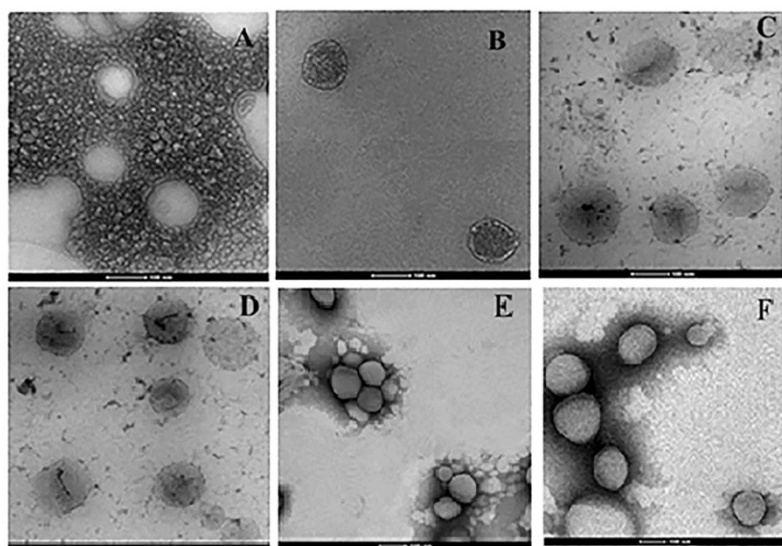

**Supplementary Fig. 1.** TEM images of **a)** empty DPPC:Cho7:3 **b)**LD-DPPC:Cho7:3 **c)** LD-(2%)PEG/LUV **d)** LD-(4%)PEG/LUV **e)** LD-(0.35%)MD-(4%)PEG/LUV **f)** LD-(0.7%)MD-(4%)PEG/LUV prepared at 40 °C

**Supplementary Table 1.** Zeta potential values of liposome groups

| <b>Liposome Groups</b>        | <b>Zeta Potential (mV)</b> |
|-------------------------------|----------------------------|
| (2%) PEG/LUV                  | -7.76                      |
| (4%) PEG/LUV                  | -5.94                      |
| LD-(0.35%) MD-(4%) PEG/LUV    | -3.92                      |
| LD-(0.7%) MD-(4%) PEG/LUV     | 0.971                      |
| LD-GSH-(0.7%) MD-(4%) PEG/LUV | -0.46                      |
